1

2

3

4 **Effectiveness and safety of acupuncture for insulin**  
5 **resistance in women with polycystic ovary syndrome:**  
6 **A systematic review and meta-analysis**

7

8

9 **Yu Liu<sup>1</sup>, Hua-ying Fan<sup>1</sup>, Jin-qun Hu<sup>1</sup>, Ming Chen<sup>1</sup>, Jiao Chen<sup>1\*</sup>**

10

11

12

13 **<sup>1</sup>Department of Acupuncture-Moxibustion and Tuina, Chengdu University of**  
14 **Traditional Chinese Medicine, Chengdu, China**

15

16

17 **\* Corresponding author**

18 **E-mail: [chenjiao@cdutcm.edu.cn](mailto:chenjiao@cdutcm.edu.cn)**

19

20

21

22

**NOTE: This preprint reports new research that has not been certified by peer review and should not be used to guide clinical practice.**

## 23 **Abstract**

24 **Objective.** To perform a systematic review and meta-analysis of randomized  
25 controlled trials (RCTs) to evaluate acupuncture's clinical effect of on insulin resistance  
26 (IR) in women with polycystic ovary syndrome (PCOS).

27

28 **Methods.** PubMed, Cochrane Library, Embase databases, and Chinese databases,  
29 including China National Knowledge Infrastructure (CNKI), Technology Journal  
30 Database (VIP), and Wanfang Database, were searched without language restrictions  
31 from inception to 20 December 2021. Only RCTs in which acupuncture had been  
32 examined as the sole or adjunctive PCOS-IR treatment were included. Additionally,  
33 only studies in Chinese databases that had been published in core journals of Peking  
34 University were included. Our primary endpoint was homeostasis model assessment of  
35 insulin resistance (HOMA-IR). The secondary outcomes were fasting blood glucose  
36 (FBG), 2-h postprandial blood glucose (2h-PBG), fasting insulin (FINS), body mass  
37 index (BMI), and adverse events. A random-effects model enabled reporting of  
38 differences between groups as mean differences, thus minimizing the effects of  
39 uncertainty associated with inter-study variability on the effects of different  
40 interventions.

41

42 **Results.** Our analysis included seven eligible RCTs (N=728 participants). Compared  
43 with other treatments, acupuncture therapy yielded a greater mean reduction in BMI  
44 (-1.21; 95% CI, -2.41 to -0.02; P=0.05). No significant differences existed between

45 acupuncture and other studied treatments for changes in HOMA-IR ( $-0.33$ ; 95% CI,  
46  $-0.87$  to  $0.22$ ;  $P>0.05$ ), FBG ( $-0.43$ ; 95% CI,  $-0.88$  to  $0.03$ ;  $P=0.07$ ), 2h-PBG ( $-0.40$ ;  
47 95% CI,  $-0.90$  to  $0.10$ ;  $P>0.05$ ), and FINS ( $-0.65$ ; 95% CI,  $-2.18$  to  $0.89$ ;  $P>0.05$ ).  
48 Furthermore, compared with medication alone, a combination of acupuncture and  
49 medication yielded a mean reduction in HOMA-IR of  $-0.63$  (95% CI,  $-1.12$  to  $-0.14$ ;  
50  $P=0.01$ ) and BMI of  $-1.36$  (95% CI,  $-2.07$  to  $-0.66$ ;  $P<0.01$ ).

51

52 **Conclusion.** Although acupuncture is not more effective than metformin, the  
53 former could be an adjuvant strategy for improving PCOS-IR. Further large-scale, long-  
54 term RCTs with strict methodological standards are justified.

55

## 56 **1 Introduction**

57 Polycystic ovary syndrome (PCOS), a complex endocrine and metabolic disorder, is  
58 characterized by androgen excess (hirsutism and/or hyperandrogenemia) and ovarian  
59 dysfunction (oligo-ovulation and/or polycystic ovarian morphology). To date, its  
60 pathogenesis remains unclear. However, insulin resistance (IR) is considered the  
61 primary pathological basis for the associated reproductive dysfunction. The prevalence  
62 of IR in clamp studies in women with PCOS diagnosed on the basis of the Rotterdam  
63 criteria and using age-appropriate lean healthy control women is reportedly 75% of lean  
64 and 95% of overweight women (weight status according to WHO criteria) [1]. IR both  
65 promotes and interacts with hyperandrogenemia, which affects the function of the  
66 hypothalamic–pituitary–ovarian axis and causes abnormal follicular development [2].

67 Additionally, regardless of age, gestational diabetes mellitus, impaired glucose  
68 tolerance, and type 2 diabetes are all significantly more prevalent in patients with PCOS.

69 Some studies have found that improving IR and reducing hyperinsulinemia can  
70 reduce systemic androgen concentrations and improve some characteristics of PCOS  
71 [3]. Metformin is often recommended to adult women or adolescents with PCOS or  
72 women with BMI>25 kg/m<sup>2</sup> for management of weight and metabolic disorders [4].  
73 However, the mechanism underlying metformin's effects on PCOS-IR is not yet fully  
74 understood and it causes adverse effects, particularly diarrhea and nausea, in up to 25%  
75 of patients [5]. Thus, metformin has limitations related to adverse effects and patient  
76 compliance. There is therefore a need for inexpensive and easily administered  
77 treatments with few adverse effects. Correlation meta-analysis has shown that  
78 acupuncture has a beneficial effect on IR and fewer adverse reactions than other  
79 treatments [6,7]. A recent meta-analysis also found that acupuncture can improve IR in  
80 patients with PCOS [8]. However, this evidence is inadequate because of the poor  
81 quality and methodology of the included studies. In addition, these authors did not  
82 determine whether acupuncture has advantages over metformin in the treatment of  
83 PCOS-IR. In the present study, we systematically reviewed data from recent studies,  
84 aiming to provide clarity concerning the role of acupuncture in treatment of PCOS-IR,  
85 especially compared with metformin.

86 In this systematic review of relevant randomized controlled trials, we aimed to  
87 evaluate the efficacy and safety of acupuncture in improving PCOS-IR by assessing the  
88 following key outcomes: homeostasis model assessment of insulin resistance (HOMA-

89 IR), fasting blood glucose (FBG), 2-h postprandial blood glucose (2h-PBG), fasting  
90 insulin (FINS), body mass index (BMI), and adverse events.

## 91 **2 Methods**

92 This analysis was performed strictly in accordance with the PRISMA statement [9] (see  
93 S1 File). Additionally, this review was registered with PROSPERO at  
94 [http://www.crd.york.ac.uk/PROSPERO\(CRD42021285851\)](http://www.crd.york.ac.uk/PROSPERO(CRD42021285851)).

### 95 **2.1 Search strategy**

96 PubMed, Cochrane Library, and Embase databases were searched without language  
97 restrictions from inception to 20 December 2021. We also searched Chinese databases,  
98 including the China National Knowledge Infrastructure (CNKI), Technology Journal  
99 (VIP), and Wanfang databases. Additionally, only studies in Chinese databases that had  
100 been published in core journals of Peking University (such as *Chinese Acupuncture and*  
101 *Moxibustion*) were included. The search terms consisted of four parts: acupuncture  
102 (acupuncture, electroacupuncture, and manual acupuncture), insulin resistance (insulin  
103 resistance and insulin sensitivity), polycystic ovary syndrome (polycystic ovary  
104 syndrome, polycystic ovarian syndrome and Stein–Leventhal syndrome), and  
105 randomized controlled trial. Details of the search strategies are presented in S2 File.

106 Additionally, ClinicalTrials.gov and the Chinese Clinical Trial Register were  
107 searched to identify ongoing or recently completed studies.

108

### 109 **2.2 Inclusion criteria**

110 **2.2.1 Types of study** All randomized controlled trials (RCTs) involving use of  
111 acupuncture for treating PCOS-IR were included.

112 **2.2.2 Types of participant** Patients diagnosed with PCOS-IR or PCOS patients  
113 with HOMA-IR $\geq$  2.14 [10], regardless of race, or educational and economic status,  
114 were included.

115 **2.2.3 Types of intervention** Interventions in the experimental group comprised  
116 acupuncture or electroacupuncture either combined with medication or not. Controlled  
117 interventions with sham acupuncture or metformin were included.

118 **2.2.4 Types of outcome measure** Studies that reported at least one clinical  
119 outcome related to PCOS-IR were included. The primary outcome was HOMA-IR. The  
120 secondary outcomes were FBG, 2h-PBG, FINS, BMI, and adverse events.

121

## 122 **2.3 Exclusion criteria**

123 **2.3.1 Types of study** Nonrandomized controlled trials, randomized crossover trials,  
124 reviews, case reports, protocols, experimental animal articles were excluded.

125 **2.3.2 Participants** Participants with serious physical or mental disease were  
126 excluded.

127 **2.3.3 Types of intervention** We did not include trials in which non-penetrating  
128 acupuncture (such as via laser stimulation, acupressure, or transcutaneous electrical  
129 nerve stimulation) was used or in which other traditional Chinese medicine was  
130 administered to the experimental group. RCTs that compared different forms of  
131 acupuncture or herbal medicine were also excluded.

132

## 133 **2.4 Study identification and data extraction**

134 Two independent appraisers (Yu Liu and Jin-qun Hu) assessed the eligibility of the  
135 searched articles in accordance with the above criteria. The following data were  
136 extracted independently from all included studies by two reviewers (Yu Liu and Ming  
137 Chen): number of participants, age, interventions, intervention duration, change in  
138 HOMA-IR (mean [SD]); change in FBG (mean [SD]); change in 2h-PBG (mean [SD]);  
139 change in FINS (mean [SD]); change in BMI (mean [SD]), and number of participants  
140 with any adverse events. Any disagreements regarding study identification and data  
141 extraction were resolved by discussion and adjudication with a third investigator (Hua-  
142 ying Fan).

143

## 144 **2.5 Quality assessment**

145 Two reviewers (Yu Liu and Jin-qun Hu) independently assessed the risk of bias of  
146 RCTs using the Cochrane Collaboration's "risk of bias" tool, which is based on the  
147 following six separate domains: random sequence generation (selection bias),  
148 allocation concealment (selection bias), blinding of participants and personnel  
149 (performance bias), blinding of outcome assessment (detection bias), incomplete  
150 outcome data (attrition bias), selective reporting (reporting bias), and other bias. The  
151 assessments were categorized into three levels of bias: low risk, high risk, or unclear  
152 risk. For example, if the investigators described a random component in the sequence  
153 generation process, such as using a computer random number generator or coin tossing,

154 “low risk” would be allocated for the domain of random sequence generation.

155 Disagreements were resolved by a third investigator (Hua-ying Fan).

156 We also used Grading of Recommendations Assessment, Development, and  
157 Evaluation (GRADE) to assess the quality of evidence, using GRADEpro GOT online  
158 software.

159

## 160 **2.6 Data synthesis**

161 We assessed the effect and safety of acupuncture for treating PCOS-IR on the basis of  
162 six outcomes: HOMA-IR, FBG, 2h-PBG, FINS, incidence of adverse events, and BMI.

163 We analyzed HOMA-IR, FBG, 2h-PBG, FINS, and BMI as continuous variables and  
164 have reported absolute differences between arithmetic means before and after  
165 interventions. Adverse events were treated as a categorical variable and the risk ratio  
166 calculated.

167 We calculated pooled estimates of the mean differences (MD) in HOMA-IR, FBG,  
168 2h-PBG, FINS, and BMI between intervention groups using a random-effects model  
169 (DerSimonian–Laird method) to minimize additional uncertainty associated with inter-  
170 study variability regarding the effects of different interventions. We also calculated  
171 pooled risk ratio estimates for categorical outcomes with a random-effects model  
172 (DerSimonian–Laird method).

173 We used the Cochran Q test to assess heterogeneity between studies. P values less  
174 than 0.1 were considered to denote statistical significance. We also did  $I^2$  testing to  
175 assess the magnitude of heterogeneity between studies, values greater than 50% being



176 regarded as indicative of moderate-to-high heterogeneity. If necessary, subgroup  
177 analyses according to type of intervention were conducted. We used RevMan (version  
178 5.4) for all statistical analyses.

## 179 **3 Results**

### 180 **3.1 Search results**

181 A flow chart of study selection is shown in Fig 1. Our preliminary search found a total  
182 of 723 articles. Removing duplicate articles and reading the title and summary filters  
183 left 62 full-text articles, 53 of which were excluded because they did not meet the  
184 inclusion criteria. Two more articles were excluded because their data were unavailable  
185 and we received no responses from the corresponding authors. Finally, seven studies  
186 including 728 patients were included in this review.

187 **Fig 1. Literature screening process and results.**

188

### 189 **3.2 Description of included studies**

190 The seven eligible RCTs including 728 patients were conducted in China. Three of  
191 them were listed in English databases and four in Chinese databases. All participants  
192 had been diagnosed with PCOS in accordance with the Rotterdam criteria and had  
193 HOMA-IR greater than 2.14, enabling diagnosis of IR [10]. The patients had a mean  
194 baseline HOMA-IR of 4.02 (range 2.37–5.06) and mean baseline BMI of 27.18 kg/m<sup>2</sup>  
195 (22.4–29.35). Electroacupuncture was compared with sham acupuncture in two studies  
196 [11,12], acupuncture combined with medication was compared with medication alone

197 in two studies [13,14], and acupuncture was compared with metformin in three studies  
198 [15–17]. Table 1 summarizes the basic characteristics of these studies.

199 **Table 1. Characteristics of included studies.**

| Study ID       | Sample size (TG/CG) | Intervention |      | Duration of intervention | Mean age (years) | Mean BMI (kg/m <sup>2</sup> ) | Mean HOMA-IR | Outcomes |
|----------------|---------------------|--------------|------|--------------------------|------------------|-------------------------------|--------------|----------|
|                |                     | TG           | CG   |                          |                  |                               |              |          |
| Dong,2021[11]  | 27/27               | EA           | SA   | 16 weeks                 | 22.8             | 22.4                          | 2.37         | ①②④⑤     |
| Gu,2019[12]    | 39/39               | EA           | SA   | 32 times                 | 27.8             | 27.6                          | 5.06         | ①②③④⑤⑥   |
| Li,2014[13]    | 53/51               | A+M          | SA+M | 6 months                 | 26.1             | 29.35                         | 3.75         | ①②④⑤⑥    |
| Mao,2021[14]   | 54/54               | EA+M+E       | M+E  | 3 MC                     | Not available    | 28.32                         | 3.83         | ①⑤       |
| Wen,2021[15]   | 114/114             | EA+P         | SA+M | 4 months                 | 27.7             | 26.15                         | 4.47         | ①②④⑤⑥    |
| Yu,2020[16]    | 36/34               | EA           | M    | 3 months                 | 30.5             | Not available                 | 4.81         | ①⑥       |
| Zheng,2013[17] | 43/43               | A            | M    | 6 months                 | 25.7             | 29.25                         | 3.85         | ①②③④⑤⑥   |

200 A, acupuncture; CG, control group; E, ethinylestradiol and cyproterone acetate tablets;  
201 EA, electroacupuncture; M, metformin; MC, menstrual cycle; P, placebo; SA, sham  
202 acupuncture; TG, treatment group; ①, HOMA-IR; ②, FBG; ③, 2h-PBG; ④, FINS;  
203 ⑤, BMI; ⑥, adverse events.

204

### 205 **3.3 Assessment of risk of bias**

206 The participants were randomized using a random number table or computer program  
207 in all seven studies. Assessment of allocation was described in three articles [11,15,17].  
208 For blinding, three trials [11,13,15] were classified as “low risk” and the others as  
209 “unclear risk”. Three articles [11,15,16] stated explicitly that third-party researchers  
210 processed the data. Four studies[11,12,15,16] reported loss to follow-up. There was  
211 attrition bias in two of these studies [11,15] as a result of differences in the proportion  
212 of missing outcome data between the experimental and comparison groups. The other  
213 three trials had a low risk of attrition bias, having reported that no participants dropped  
214 out or were excluded from the primary analysis. Details of the assessments are shown  
215 in Figs 2 and 3.

216 **Fig 2. Assessment of risk biases of the included studies.**

217 **Fig 3. Assessment of risk biases of the included studies.**

218

### 219 **3.4 Meta-analysis of primary outcomes**

220 A pooled meta-analysis analysis of the seven trials found no statistically significant  
221 differences in changes in HOMA-IR (MD, -0.33; 95% CI, -0.87 to 0.22; P=0.24; Fig  
222 4) between the two groups, with statistically significant heterogeneity ( $P<0.1$ ;  $I^2=82\%$ ).

223 To further analyze heterogeneity, we performed subgroup analysis of different  
224 interventions to more accurately examine the effects of acupuncture. Sensitivity  
225 analysis comparing acupuncture treatment with metformin or sham acupuncture  
226 identified no significant differences (MD, 0.04; 95% CI, -0.7 to 0.78; P=0.92; Fig 4)  
227 (MD, -0.64; 95% CI, -2.2 to 0.93; P=0.42; Fig 4). However, comparison of a

228 combination of acupuncture and medication with medication alone showed a greater  
229 mean reduction in HOMA-IR with the former (MD, -0.63; 95% CI, -1.12 to -0.14;  
230 P=0.01; Fig 4).

231 **Fig 4. Comparison of changes in HOMA-IR according to intervention.**

232

### 233 **3.5 Meta-analysis of secondary outcomes**

234 **3.5.1 FBG** Pooled analysis of the five studies that assessed changes in participants'  
235 FBG after treatment showed a trend to improvement in FBG that was not statistically  
236 significant (MD, -0.43; 95% CI, -0.88 to 0.03; P=0.07; Fig 5), with statistically  
237 significant heterogeneity (P<0.1;  $I^2=86%$ ).

238 Forest plots generated in further sensitivity analysis showed no significant difference  
239 between acupuncture and metformin (MD, -0.17; 95% CI, -0.4 to 0.05; P=0.13; Fig  
240 5). Additionally, combination treatment showed no benefit over medication alone (MD,  
241 -0.4; 95% CI, -1.03 to 0.23; P=0.21; Fig 5).

242 **Fig 5. Comparison of changes in FBG according to intervention.**

243 **3.5.2 2h-PBG** Two studies (N=162 participants) assessed changes in 2h-PBG at the  
244 end of the intervention. Pooling the data of these studies showed no significant  
245 difference in mean reduction of 2h-PBG between acupuncture and other treatments  
246 (MD, -0.40; 95% CI, -0.90 to 0.10; P=0.12; Fig 6), without between-study  
247 heterogeneity.

248 **Fig 6. Comparison of changes in 2h-PBG according to intervention.**

249 **3.5.3 FINS** Five studies (N=502 participants) assessed changes in participants' FINS  
250 after treatment. Pooled analysis of these studies' findings showed that acupuncture was  
251 not more effective than other treatments regarding mean reduction in FINS (MD, -0.65;  
252 95% CI, -2.18 to 0.89; P=0.41; Fig 7), with no significant between-study heterogeneity  
253 (P>0.1; I<sup>2</sup>=37%).

254 **Fig 7 Comparison of changes in FINS according to intervention.**

255 **3.5.4 BMI.** Six studies assessed changes in participants' BMI after treatment.  
256 Analysis of pooled data of these studies showed that acupuncture was associated with  
257 a greater reduction in weight than other treatment (MD, -1.21; 95% CI, -2.41 to -0.02;  
258 P=0.05; Fig 8), with statistically significant heterogeneity (P<0.1; I<sup>2</sup>=88%).

259 Sensitivity analysis revealed no statistically significant difference in changes in  
260 BMI between acupuncture and metformin (MD, -0.75; 95% CI, -3.33 to 1.82; P=0.57;  
261 Fig 8). However, a combination of acupuncture and medication achieved a greater mean  
262 reduction in BMI than did medication alone (MD, -1.36; 95% CI, -2.07 to -0.66;  
263 P<0.01; Fig 8).

264 **Fig 8. Comparison of changes in BMI according to intervention.**

265 **3.5.5 Adverse events** Five of the studies reported adverse events. Three of these  
266 studies compared acupuncture with metformin, one compared combined treatment with  
267 acupuncture and medication with medication alone and one compared  
268 electroacupuncture with sham acupuncture. One [16] reported 29.4% cases of nausea,  
269 emesis, diarrhea, and loss of appetite in the control group and 11.1% of subcutaneous  
270 bruising and hematoma in the experimental group. One [15] reported 87.7% adverse

271 gastrointestinal events in the control group and 14.9% cases of subcutaneous bruising  
 272 and hematoma in the experimental group. One [17] reported 48.8% adverse effects in  
 273 the control group and none in the experimental group. One [13] reported 43.1% cases  
 274 of nausea, emesis, diarrhea, and loss of appetite in the control group and 34% adverse  
 275 events in the experimental group. Most adverse events were digestive tract reactions or  
 276 subcutaneous bruising and hematoma and resolved quickly. There were no distressing  
 277 symptoms or liver or kidney injury. Table 2 displays the reported details.

278 **Table 2. Reported adverse events.**

| Study ID       | Sample size |     | Intervention |      | Nausea, emesis, diarrhea, and loss of appetite |     | Subcutaneous bruising and hematoma |    |
|----------------|-------------|-----|--------------|------|------------------------------------------------|-----|------------------------------------|----|
|                | TG          | CG  | TG           | CG   | TG                                             | CG  | TG                                 | CG |
| Gu,2019[12]    | 39          | 39  | EA           | SA   | -                                              | -   | 0                                  | 0  |
| Li,2014[13]    | 53          | 51  | A+M          | SA+M | 18                                             | 22  | -                                  | -  |
| Wen,2021[15]   | 114         | 114 | EA+P         | SA+M | -                                              | 100 | 17                                 | -  |
| Yu,2020[16]    | 36          | 34  | EA           | M    | -                                              | 10  | 4                                  | -  |
| Zheng,2013[17] | 43          | 43  | A            | M    | -                                              | 21  | 0                                  | -  |

279 A, acupuncture; CG, control group; EA, electroacupuncture; M, metformin; P,  
 280 placebo; SA, sham acupuncture; TG, treatment group.

281

282 **3.6 Quality of evidence.**

283 The quality of evidence assessed using the GRADE system varied from very low to  
 284 low. According to this system, FINS had a low evidence level because the means of  
 285 assessing allocation was not described, and the upper or lower confidence limits crossed  
 286 an effect size of 0.5 in both directions. Further, HOMA-IR, FBG, 2h-PBG, and BMI  
 287 had very low evidence levels. Details of assessment are shown in Table 3.

288 **Table 3. Assessment according to GRADE system.**

| Outcome | Certainty assessment |                      |                           |              |                      |                      | Effect           |                                           | Number of patients (studies) | Certainty of the evidence (GRADE) |
|---------|----------------------|----------------------|---------------------------|--------------|----------------------|----------------------|------------------|-------------------------------------------|------------------------------|-----------------------------------|
|         | Study design         | Risk of bias         | Inconsistency             | Indirectness | Imprecision          | Other considerations | Relative (95%CI) | Absolute                                  |                              |                                   |
| HOMA-IR | RCT                  | serious <sup>a</sup> | very serious <sup>b</sup> | not serious  | serious <sup>c</sup> | none                 | -                | MD 0.33 lower (0.87 lower to 0.22 higher) | 669 (7 RCTs)                 | ⊕⊕<br>⊕⊕<br>Very low              |
| FBG     | RCT                  | serious <sup>a</sup> | very serious <sup>b</sup> | not serious  | serious <sup>c</sup> | none                 | -                | MD 0.43 lower (0.88 lower to 0.03 higher) | 501 (5 RCTs)                 | ⊕⊕<br>⊕⊕<br>Very low              |

|            |     |                         |                              |                |                              |      |   |                                                 |                        |                         |
|------------|-----|-------------------------|------------------------------|----------------|------------------------------|------|---|-------------------------------------------------|------------------------|-------------------------|
| 2h-<br>PBG | RCT | serious<br><sup>a</sup> | not<br>serious               | not<br>serious | very<br>serious <sup>d</sup> | none | - | MD 0.4 lower<br>(0.9 lower to 0.1<br>higher)    | 162<br>(2<br>RCTs<br>) | ⊕⊕<br>⊕⊕<br>Very<br>low |
| FINS       | RCT | serious<br><sup>a</sup> | not<br>serious               | not<br>serious | serious <sup>c</sup>         | none | - | MD 0.65 lower<br>(2.18 lower to<br>0.89 higher) | 502<br>(5<br>RCTs<br>) | ⊕⊕<br>⊕⊕<br>low         |
| BMI        | RCT | serious<br><sup>a</sup> | very<br>serious <sup>b</sup> | not<br>serious | not<br>serious               | none | - | MD 1.21 lower<br>(2.41 lower to<br>0.02 lower)  | 612<br>(6<br>RCTs<br>) | ⊕⊕<br>⊕⊕<br>Very<br>low |

289 <sup>a</sup> The means of assessing allocation is not described.

290 <sup>b</sup>  $I^2 \geq 75\%$  in the Q statistics indicates serious inconsistency in the meta-analysis.

291 <sup>c</sup> The upper or lower confidence limit has crossed an effect size of 0.5 in either direction.

292 <sup>d</sup> Total cohort is less than 400, and effect size is considered small; the upper or lower  
293 confidence limit has crossed an effect size of 0.5 in either direction.

## 294 Discussion

### 295 Main findings

296 The purpose of this review was to evaluate the effectiveness of acupuncture for IR in  
297 patients with PCOS. We found acupuncture to be significantly associated with greater  
298 loss of body weight (based on very low-certainty evidence) than other treatments.



299 However, we identified no significant differences for the other studied outcomes,  
300 namely FINS (based on low-certainty evidence), and HOMA-IR, FBG, and 2h-PBG  
301 (all based on very low-certainty evidence). Although acupuncture is not more effective  
302 than metformin in improving IR, it does not cause nausea, emesis, or diarrhea, and any  
303 subcutaneous hematoma will resolve quickly. Furthermore, we found that, compared  
304 with medication alone, a combination of acupuncture and medication yields  
305 improvements in HOMA-IR and BMI with fewer gastrointestinal adverse events.  
306 Therefore, our findings indicate that acupuncture is a promising adjuvant strategy for  
307 treating PCOS-IR.

308 The cause of PCOS is unknown. However, it is strongly associated with IR and the  
309 risk of type 2 diabetes in PCOS patients is 5–10 times higher than that in the general  
310 population [18]. Clinical and experimental evidence has shown that acupuncture is an  
311 acceptable, adverse effect-free alternative or complement to pharmacological induction  
312 of ovulation in women with PCOS and may also relieve other symptoms [19]. There is  
313 also evidence that acupuncture can be an insulin sensitizer and may therefore contribute  
314 to controlling obesity and type 2 diabetes [20,21]. Acupuncture ameliorates IR through  
315 enhancing autophagy [22], affecting insulin receptor signal transduction, and increased  
316 expression of insulin receptor substrate in the endometrium in a PCOS-like rat model  
317 [23,24].

318

## 319 **Limitations**

320 First, most studies examined were small and some of them described the specifics of  
321 assessing allocation and blinding poorly. Their quality was therefore mediocre. Besides,  
322 according to the GRADE system, only one outcome was based on low-certainty  
323 evidence, the other four outcomes being based on very low-certainty evidence. Second,  
324 these studies lack follow-up data, hindering assessment of the long-term efficacy of  
325 acupuncture for PCOS-IR.

326 Finally, there was heterogeneity in some outcomes. We accordingly performed  
327 subgroup analyses; however, the likelihood of false negative and false positive findings  
328 regarding significance increase rapidly with increasing numbers of subgroup analyses.  
329 Of note, metabolic syndrome has varying clinical manifestations and biochemical  
330 characteristics, age distribution, and abnormal glucose metabolism. Further, there were  
331 differences in the details of the interventions, severity of disease, dosage of metformin,  
332 and acupuncture protocols between studies.

333

### 334 **Implications for further clinical research**

335 Being a safe and simple treatment modality, acupuncture could be a good alternative or  
336 adjuvant therapy for PCOS-IR, especially for overweight patients. Because it has fewer  
337 adverse effects than metformin, patient acceptance and compliance may be higher.  
338 Regardless of age, the prevalences of gestational diabetes mellitus, impaired glucose  
339 tolerance, and type 2 diabetes are significantly greater in individuals with PCOS than  
340 in those without it. The risk is not related to obesity but is increased by obesity [4].  
341 Successful treatment of obesity therefore reduces IR [25]. It is gratifying that

342 acupuncture is significantly more effective at achieving weight loss than other  
343 treatments. Unfortunately, the long-term effects of acupuncture are still unknown.  
344 Additional long-term follow-up studies are needed to clarify the role of acupuncture in  
345 the treatment of PCOS-IR.

346 In addition, some comparative studies of acupuncture and sham acupuncture have  
347 found that these two interventions achieve equivalent results. A review of the designs  
348 of these studies revealed that sham acupuncture involved needling non-acupuncture or  
349 irrelevant acupuncture points, or superficial needling. However, insertion of a needle  
350 into a recognized acupuncture or non-acupuncture point can produce a physiological  
351 effect, partly by activating the pain inhibiting system in the spinal cord and diffuse  
352 noxious inhibitory controls [26–29]. In addition, sham acupuncture applied at non-  
353 acupuncture points may serve as an active control because acupoint areas can be  
354 enlarged by increased expression of nociceptive substances in individuals with painful  
355 conditions [30]. It has therefore been suggested that more research into applying non-  
356 penetrating sham acupuncture at non-acupuncture points is necessary [31]. This would  
357 avoid segmental analgesia and minimize any physiological effect in the sham  
358 acupuncture group.

359

360

## 361 **Conclusions**

362 This review of seven RCTs shows that acupuncture can reduce body weight  
363 significantly in individuals with PCOS-IR and that, while not being more effective than

364 metformin, it has fewer adverse effects. Additionally, combination treatment with  
365 acupuncture and medication more effectively improves HOMA-IR and BMI, with less  
366 gastrointestinal adverse events, than medication alone. Acupuncture may be an  
367 effective adjuvant strategy for improving PCOS-IR. However, the evidence for this  
368 conclusion is based on only a few studies with obvious limitations related to both  
369 sample size and methodology. Further large-scale, long-term RCTs with strict  
370 methodological standards are justified.

371

## 372 **Acknowledgment**

373 We thank Dr Trish Reynolds, MBBS, FRACP, from Liwen Bianji (Edanz)  
374 ([www.liwenbianji.cn/](http://www.liwenbianji.cn/)), for editing the English text of a draft of this manuscript.

375

## 376 **References**

- 377 **1.** Stepto NK, Cassar S, Joham AE, Hutchison SK, Harrison CL, Goldstein RF, et al. Women  
378 with polycystic ovary syndrome have intrinsic insulin resistance on euglycaemic-  
379 hyperinsulaemic clamp. *Hum Reprod.* 2013; 28:777–84. PMID: 23315061
  
- 380 **2.** Rosenfield RL, Ehrmann DA. The Pathogenesis of Polycystic Ovary Syndrome (PCOS): The  
381 Hypothesis of PCOS as Functional Ovarian Hyperandrogenism Revisited. *Endocr Rev.* 2016;  
382 37:467–520. PMID: 27459230
  
- 383 **3.** De Leo V, la Marca A, Petraglia F. Insulin-lowering agents in the management of polycystic  
384 ovary syndrome. *Endocr Rev.* 2003; 24:633–67. PMID: 14570747

- 385 4. Teede HJ, Misso ML, Costello MF, Dokras A, Laven J, Moran L, et al. Recommendations  
386 from the international evidence-based guideline for the assessment and management of  
387 polycystic ovary syndrome. *Fertil Steril*. 2018; 110:364–79. PMID: 30033227
- 388 5. Flory J, Lipska K. Metformin in 2019. *JAMA*. 2019; 321:1926–7. PMID: 31009043
- 389 6. Song Ai-Qun, Zhang Yang-Pu, Chen Rui, Liang Feng-Xia. Is Acupuncture Effective for  
390 Improving Insulin Resistance? A Systematic Review and Meta-analysis. *Curr Med Sci*. 2018;  
391 38:1109–16. PMID: 30536077
- 392 7. Wu Liqun, Chen Xiaokun, Liu Yun, Lan Jiao, Wu Chunxiao, Li Zhixing, et al. Role of  
393 acupuncture in the treatment of insulin resistance: A systematic review and meta-analysis.  
394 *Complement Ther Clin Pract*. 2019; 37:11–22. PMID: 31445362
- 395 8. Zheng R, Qing P, Han M, Song J, Hu M, Ma H, et al. The Effect of Acupuncture on Glucose  
396 Metabolism and Lipid Profiles in Patients with PCOS: A Systematic Review and Meta-  
397 Analysis of Randomized Controlled Trials. *Evid Based Complement Alternat Med*. 2021;  
398 2021:5555028. PMID: 33824676
- 399 9. Moher D, Liberati A, Tetzlaff J, Altman DG, PRISMA Group. Preferred reporting items for  
400 systematic reviews and meta-analyses: the PRISMA statement. *BMJ*. 2009;339: b2535. PMID:  
401 19622551
- 402 10. Chen Xiaoli, Yang Dongzi, Li Lin, Feng Shuying, Wang Liangan. Abnormal glucose  
403 tolerance in Chinese women with polycystic ovary syndrome. *Hum Reprod*. 2006; 21:2027–  
404 32. PMID: 28683241

- 405 **11.** Dong H-X, Wang Q, Wang Z, Wu X-K, Cheng L, Zhou Z-M, et al. Impact of Low Frequency  
406 Electro-acupuncture on Glucose and Lipid Metabolism in Unmarried PCOS Women: A  
407 Randomized Controlled Trial. *Chin. J. Integr. Med.* 2021; 27(10):737-743. PMID: 34319506
- 408 **12.** Gu Y, Xu X-F, He X-Y. Effect of acupuncture on improving glucose and lipid metabolism  
409 disorder in polycystic ovary syndrome. *Shizhen national medicine.* 2019; 30:2431–3.
- 410 **13.** Li L, Mo H, Wen B, Zhang J, Li Y, Chen W-F, et al. Clinical study on acupuncture combined  
411 with metformin in the treatment of infertility with obese polycystic ovary syndrome. *Chinese*  
412 *Journal of traditional Chinese Medicine.* 2014; 29:2115–9.
- 413 **14.** Mao M-Y, Lin L-C. Clinical effect of Tongyuan acupuncture on polycystic ovary syndrome  
414 of spleen deficiency and phlegm dampness type. *Journal of Guangzhou University of*  
415 *traditional Chinese Medicine.* 2021; 38:2138–45.
- 416 **15.** Wen Q, Hu M, Lai M, Li J, Hu Z, Quan K, et al. Effect of acupuncture and metformin on  
417 insulin sensitivity in women with polycystic ovary syndrome and insulin resistance: a three-  
418 armed randomized controlled trial. *Hum Reprod.* 2021; deab272. PMID: 28274268
- 419 **16.** Yu L-Q, Cao L-Y, Xie J, Shi Y, Zhou L-Y, He T-F, et al. Effect and mechanism of  
420 Electroacupuncture on insulin resistant polycystic ovary syndrome. *Chinese acupuncture.*  
421 2020; 40:379–83.
- 422 **17.** Zheng Y-H, Wang X-H, Lai M-H, Yao H, Liu H, Ma H-X. Effectiveness of abdominal  
423 acupuncture for patients with obesity-type polycystic ovary syndrome: A randomized  
424 controlled trial. *J. Altern. Complement. Med.* 2013; 19:740–5. PMID: 23676106

- 425 **18.** Ovalle F, Azziz R. Insulin resistance, polycystic ovary syndrome, and type 2 diabetes mellitus.  
426 Fertil Steril. 2002; 77:1095–105. PMID: 12057712
- 427 **19.** Stener-Victorin E, Jedel E, Mannerås L. Acupuncture in polycystic ovary syndrome: current  
428 experimental and clinical evidence. J Neuroendocrinol. 2008; 20:290–8. PMID: 18047551
- 429 **20.** Liang F, Koya D. Acupuncture: is it effective for treatment of insulin resistance? Diabetes  
430 Obes Metab. 2010; 12:555–69. PMID: 20590731
- 431 **21.** Firouzjaei A, Li G-C, Wang N, Liu W-X, Zhu B-M. Comparative evaluation of the therapeutic  
432 effect of metformin monotherapy with metformin and acupuncture combined therapy on  
433 weight loss and insulin sensitivity in diabetic patients. Nutr Diabetes. 2016;6: e209. PMID:  
434 27136447
- 435 **22.** Peng Y, Guo L, Gu A, Shi B, Ren Y, Cong J, et al. Electroacupuncture alleviates polycystic  
436 ovary syndrome-like symptoms through improving insulin resistance, mitochondrial  
437 dysfunction, and endoplasmic reticulum stress via enhancing autophagy in rats. Mol Med.  
438 2020; 26:73. PMID: 32698821
- 439 **23.** Zhang L, Li M, Yi W, Xu N-G, Sun J. Effect of acupuncture on PI3K p85 in skeletal muscle  
440 of rats with insulin resistance. New traditional Chinese Medicine. 2010; 42:112-114+148.
- 441 **24.** Lai M-H, Ma H-X, Li J, Song X-H, Liu H. Effects of Electroacupuncture on IRS1 and IRS2  
442 mRNA expression and insulin sensitivity in endometrium of PCOS rats. Chinese Journal of  
443 integrated traditional Chinese and Western Medicine. 2016; 36:1082–6.

- 444 **25.** Greenfield JR, Campbell LV. Insulin resistance and obesity. *Clin Dermatol.* 2004; 22:289–  
445 95. PMID: 15475228
- 446 **26.** Moffet HH. Sham acupuncture may be as efficacious as true acupuncture: a systematic review  
447 of clinical trials. *J Altern Complement Med.* 2009; 15:213–6. PMID: 19250001
- 448 **27.** Le Bars D, Villanueva L, Bouhassira D, Willer JC. Diffuse noxious inhibitory controls (DNIC)  
449 in animals and in man. *Patol Fiziol Eksp Ter.* 1992;55–65. PMID: 1303506
- 450 **28.** Cadden SW, Villanueva L, Chitour D, Le Bars D. Depression of activities of dorsal horn  
451 convergent neurones by propriospinal mechanisms triggered by noxious inputs; comparison  
452 with diffuse noxious inhibitory controls (DNIC). *Brain Res.* 1983; 275:1–11. PMID: 6626970
- 453 **29.** Liu X, Zhu B, Zhang S. Relationship between electroacupuncture analgesia and descending  
454 pain inhibitory mechanism of nucleus raphe magnus. *Pain.* 1986; 24:383–96. PMID: 3485785
- 455 **30.** He W, Wang X-Y, Shi H, Bai W-Z, Cheng B, Su Y-S, et al. Cutaneous neurogenic  
456 inflammation in the sensitized acupoints induced by gastric mucosal injury in rats. *BMC*  
457 *Complement Altern Med.* 2017; 17:141. PMID: 28270193
- 458 **31.** Xu Shabei, Yu Lingling, Luo Xiang, Wang Minghuan, Chen Guohua, Zhang Qing, et al.  
459 Manual acupuncture versus sham acupuncture and usual care for prophylaxis of episodic  
460 migraine without aura: multicentre, randomised clinical trial. *BMJ.* 2020;368:m697. PMID:  
461 32213509
- 462



463

464 **Supporting information**

465 **S1 File. PRISMA Checklist**

466 (DOC)

467 **S2 File. Search strategies used in English databases**

468 (DOC)

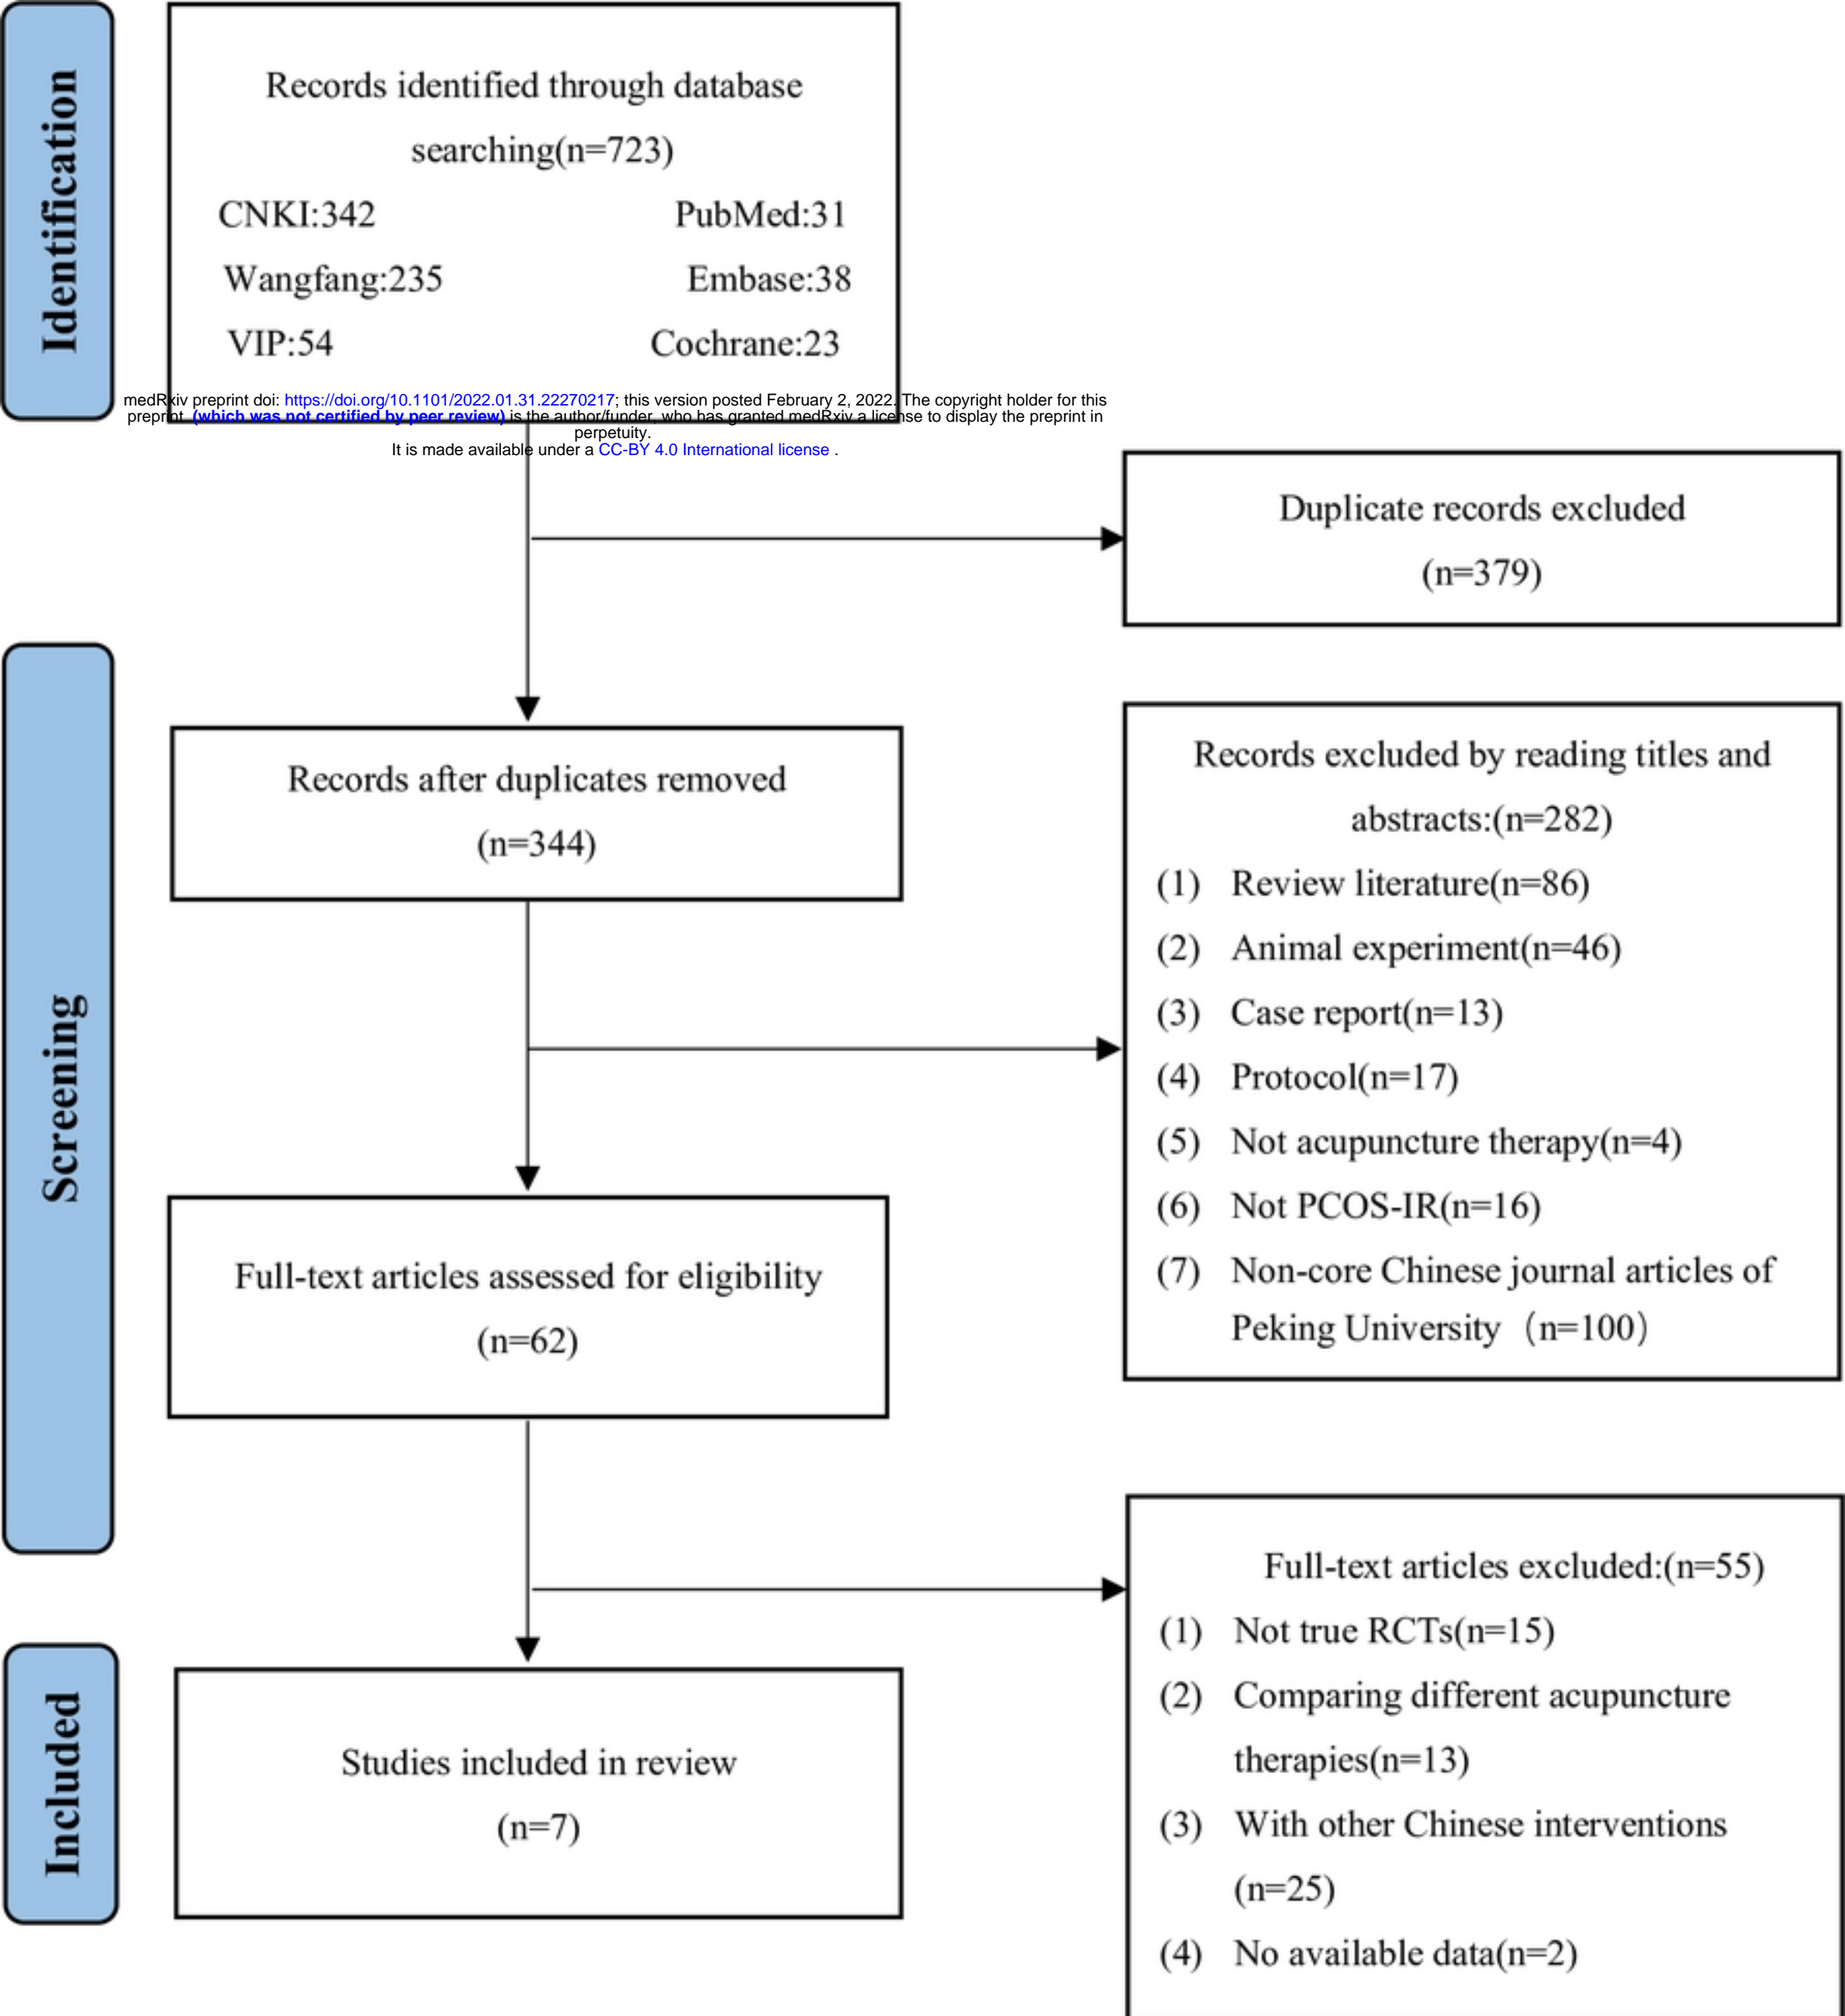

Fig 1

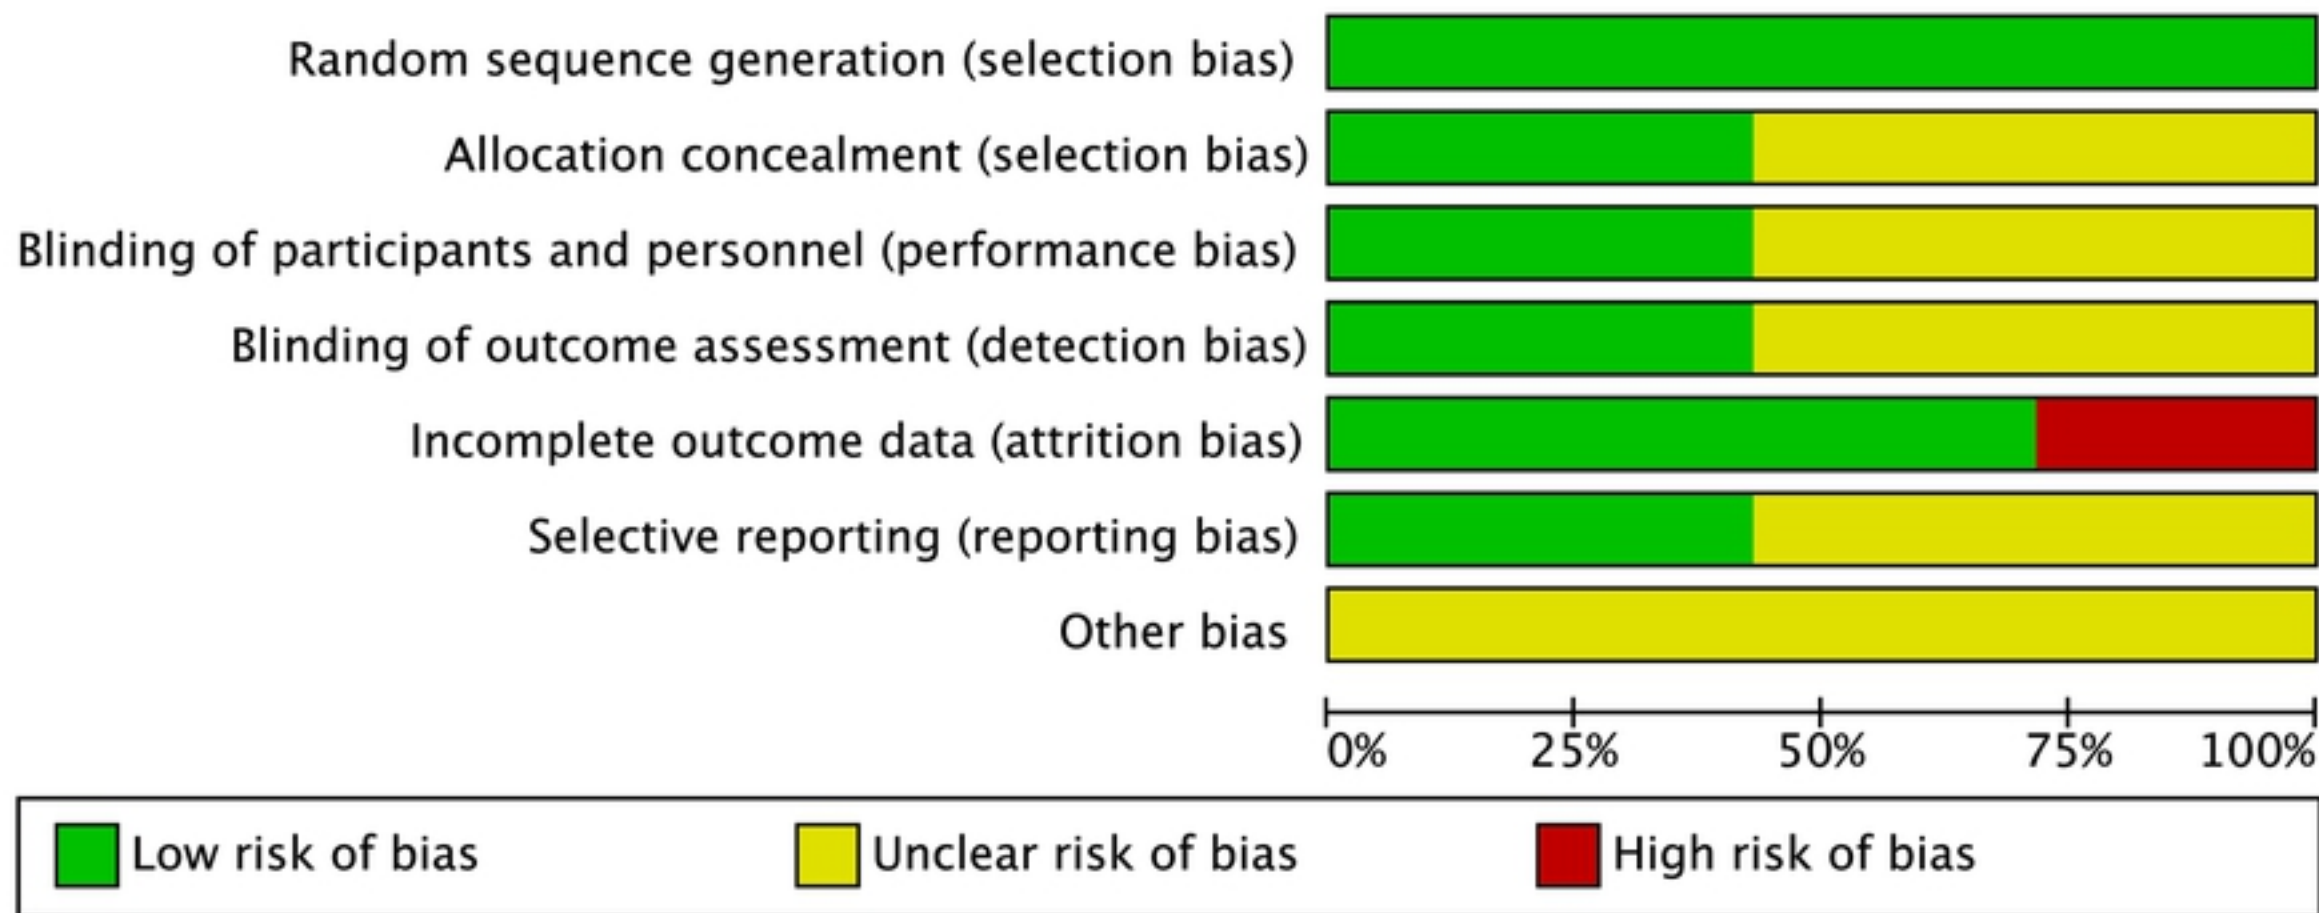

Fig2

medRxiv preprint doi: <https://doi.org/10.1101/2022.01.31.22270217>; this version posted February 2, 2022. The copyright holder for this preprint (which was not certified by peer review) is the author/funder, who has granted medRxiv a license to display the preprint in perpetuity. It is made available under a [CC-BY 4.0 International license](#).

|            | Random sequence generation (selection bias) | Allocation concealment (selection bias) | Blinding of participants and personnel (performance bias) | Blinding of outcome assessment (detection bias) | Incomplete outcome data (attrition bias) | Selective reporting (reporting bias) | Other bias |
|------------|---------------------------------------------|-----------------------------------------|-----------------------------------------------------------|-------------------------------------------------|------------------------------------------|--------------------------------------|------------|
| Dong 2021  | +                                           | +                                       | +                                                         | +                                               | -                                        | +                                    | ?          |
| Gu 2019    | +                                           | ?                                       | ?                                                         | ?                                               | +                                        | ?                                    | ?          |
| Li 2014    | +                                           | ?                                       | +                                                         | ?                                               | +                                        | ?                                    | ?          |
| Mao 2021   | +                                           | ?                                       | ?                                                         | ?                                               | +                                        | ?                                    | ?          |
| Wen 2021   | +                                           | +                                       | +                                                         | +                                               | -                                        | +                                    | ?          |
| Yu 2020    | +                                           | ?                                       | ?                                                         | +                                               | +                                        | ?                                    | ?          |
| Zheng 2013 | +                                           | +                                       | ?                                                         | ?                                               | +                                        | +                                    | ?          |

Fig3

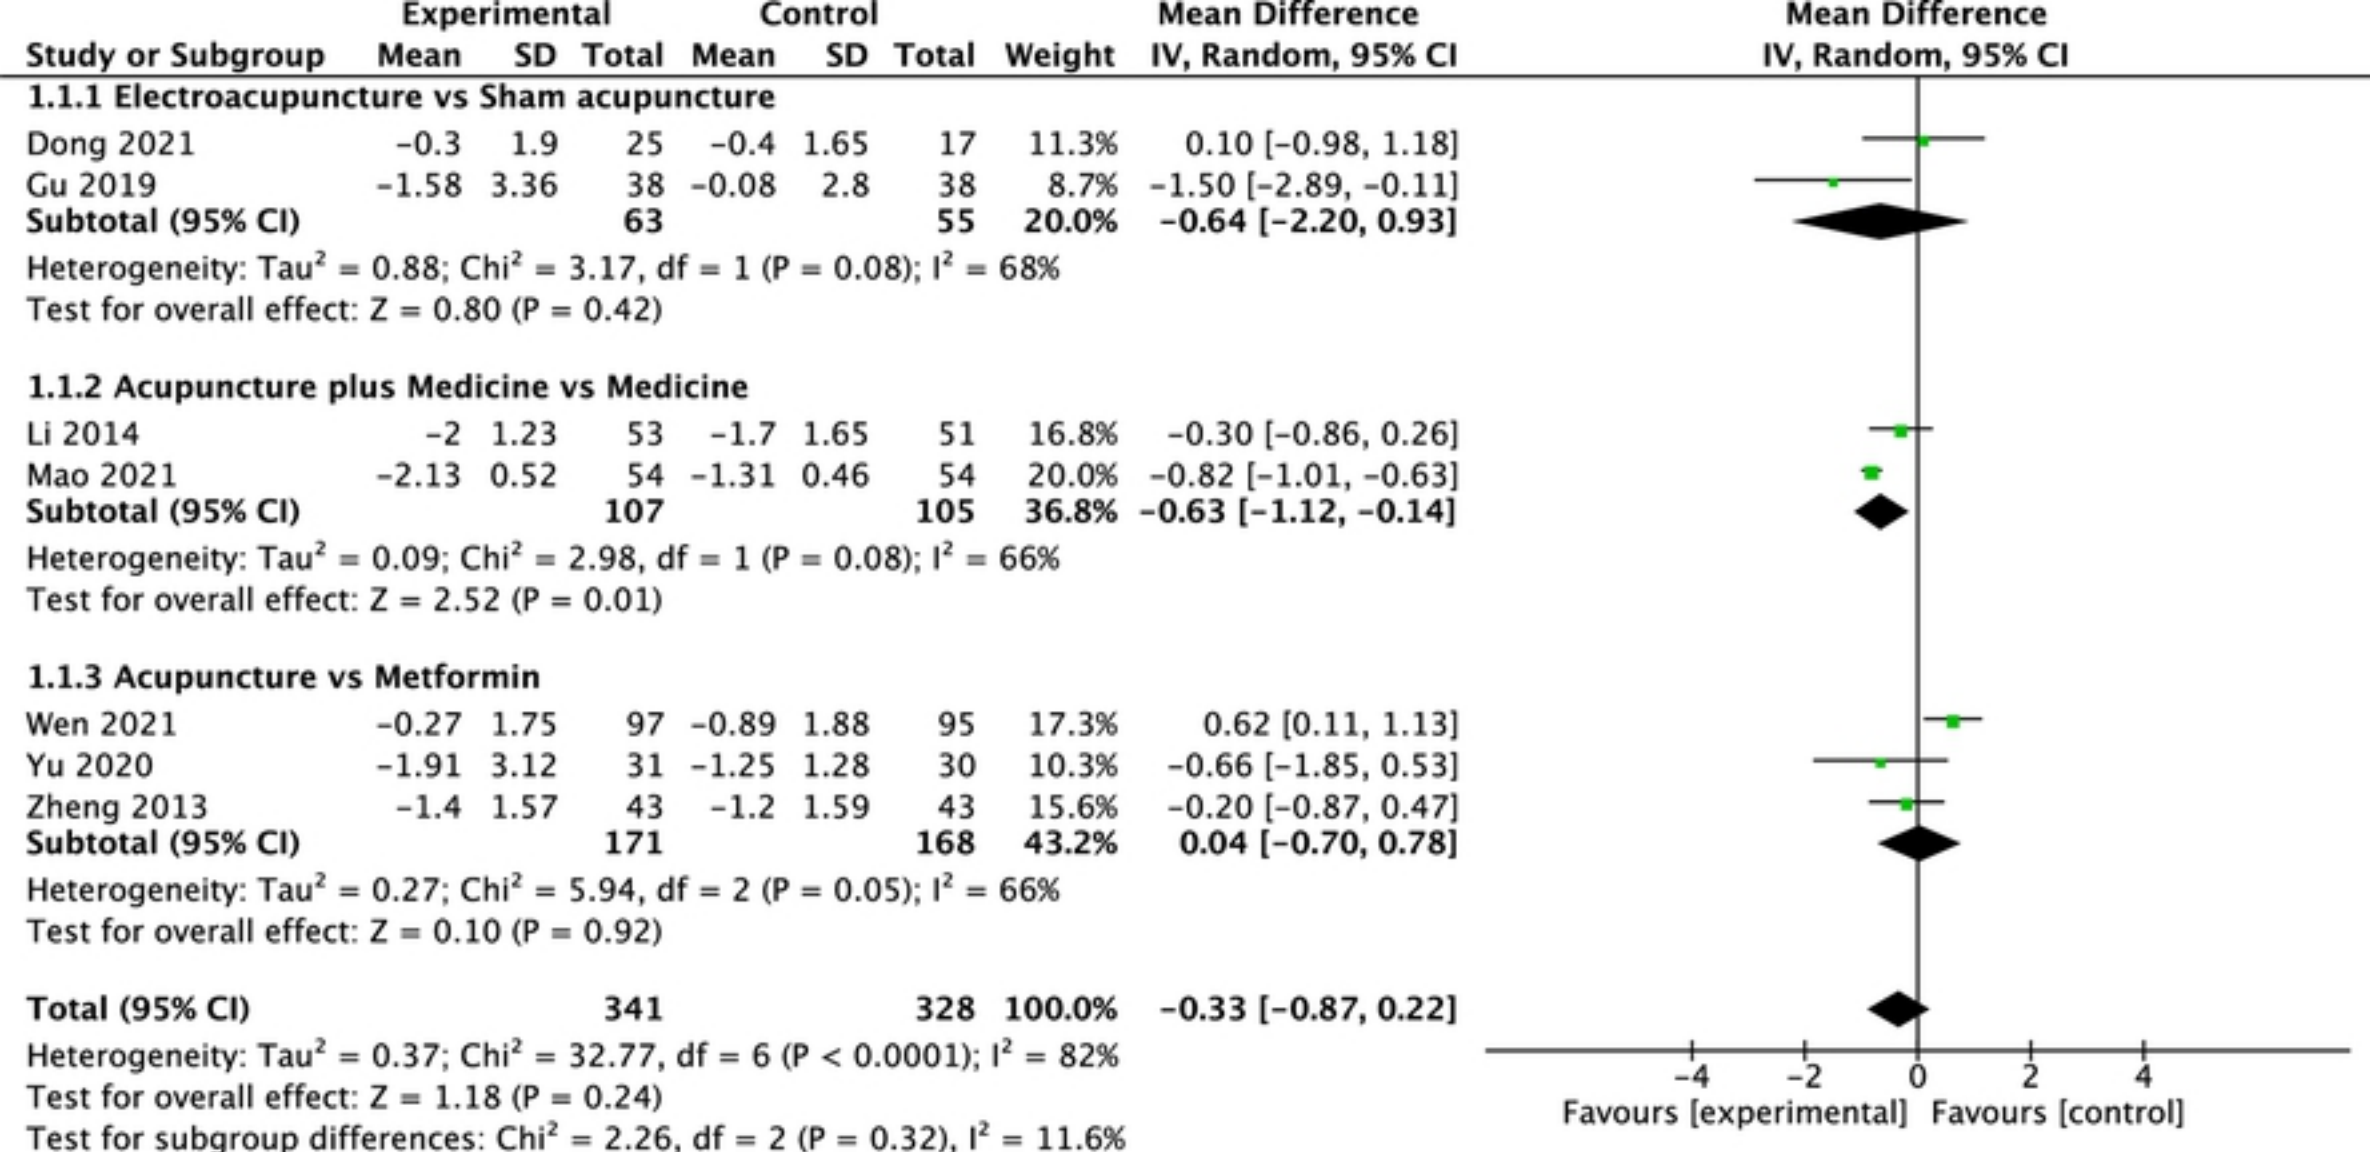

Fig4

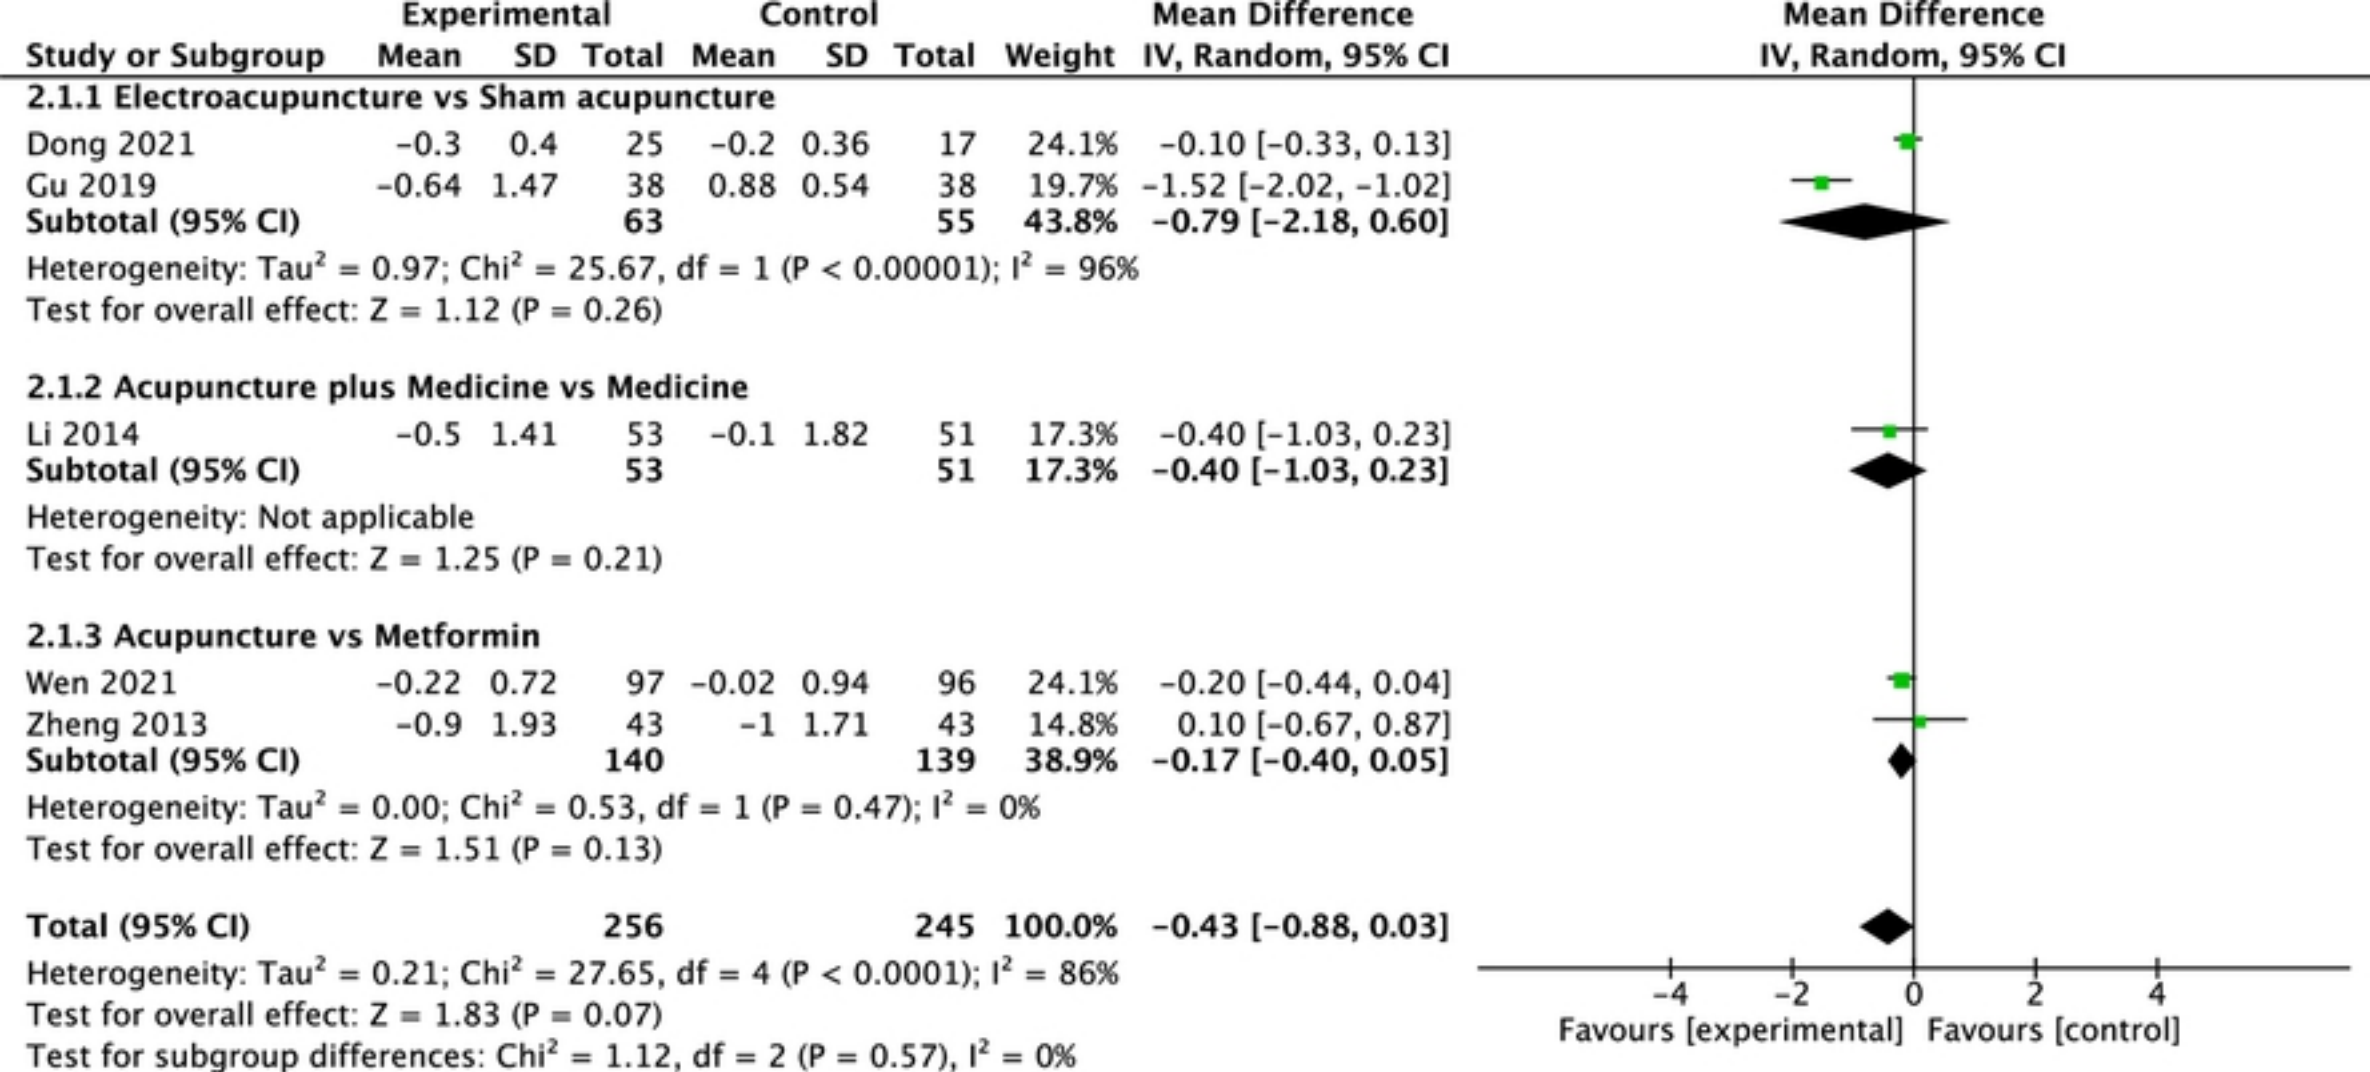

Fig5

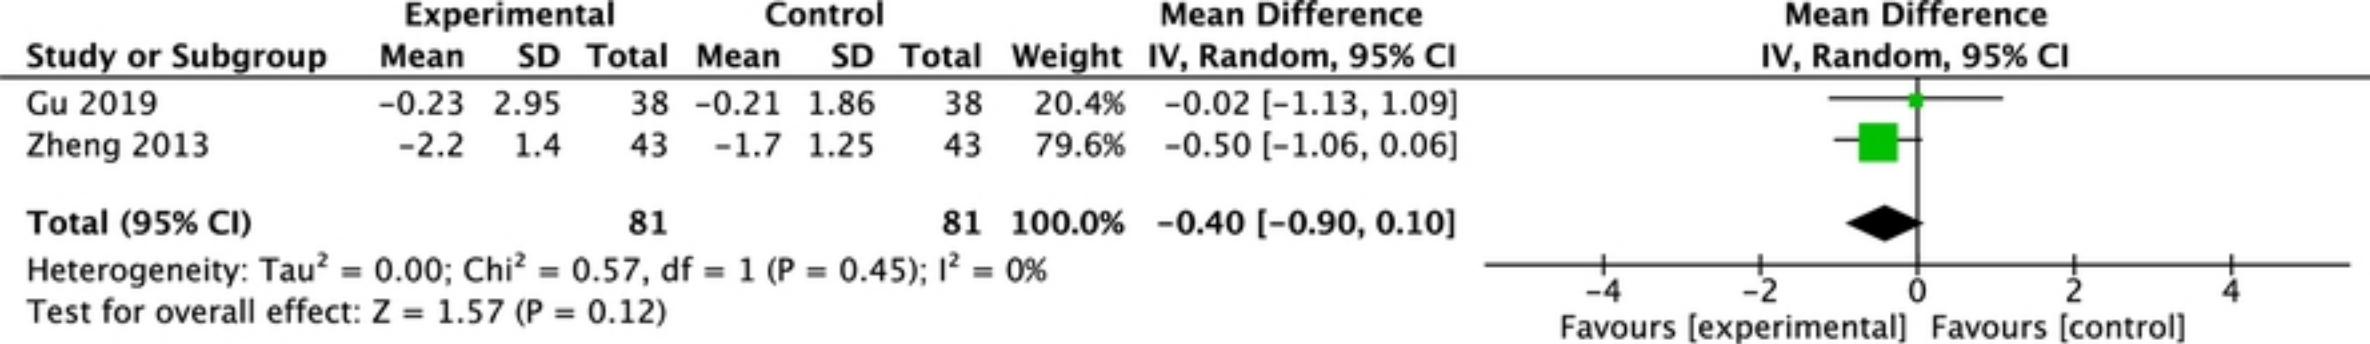

Fig6

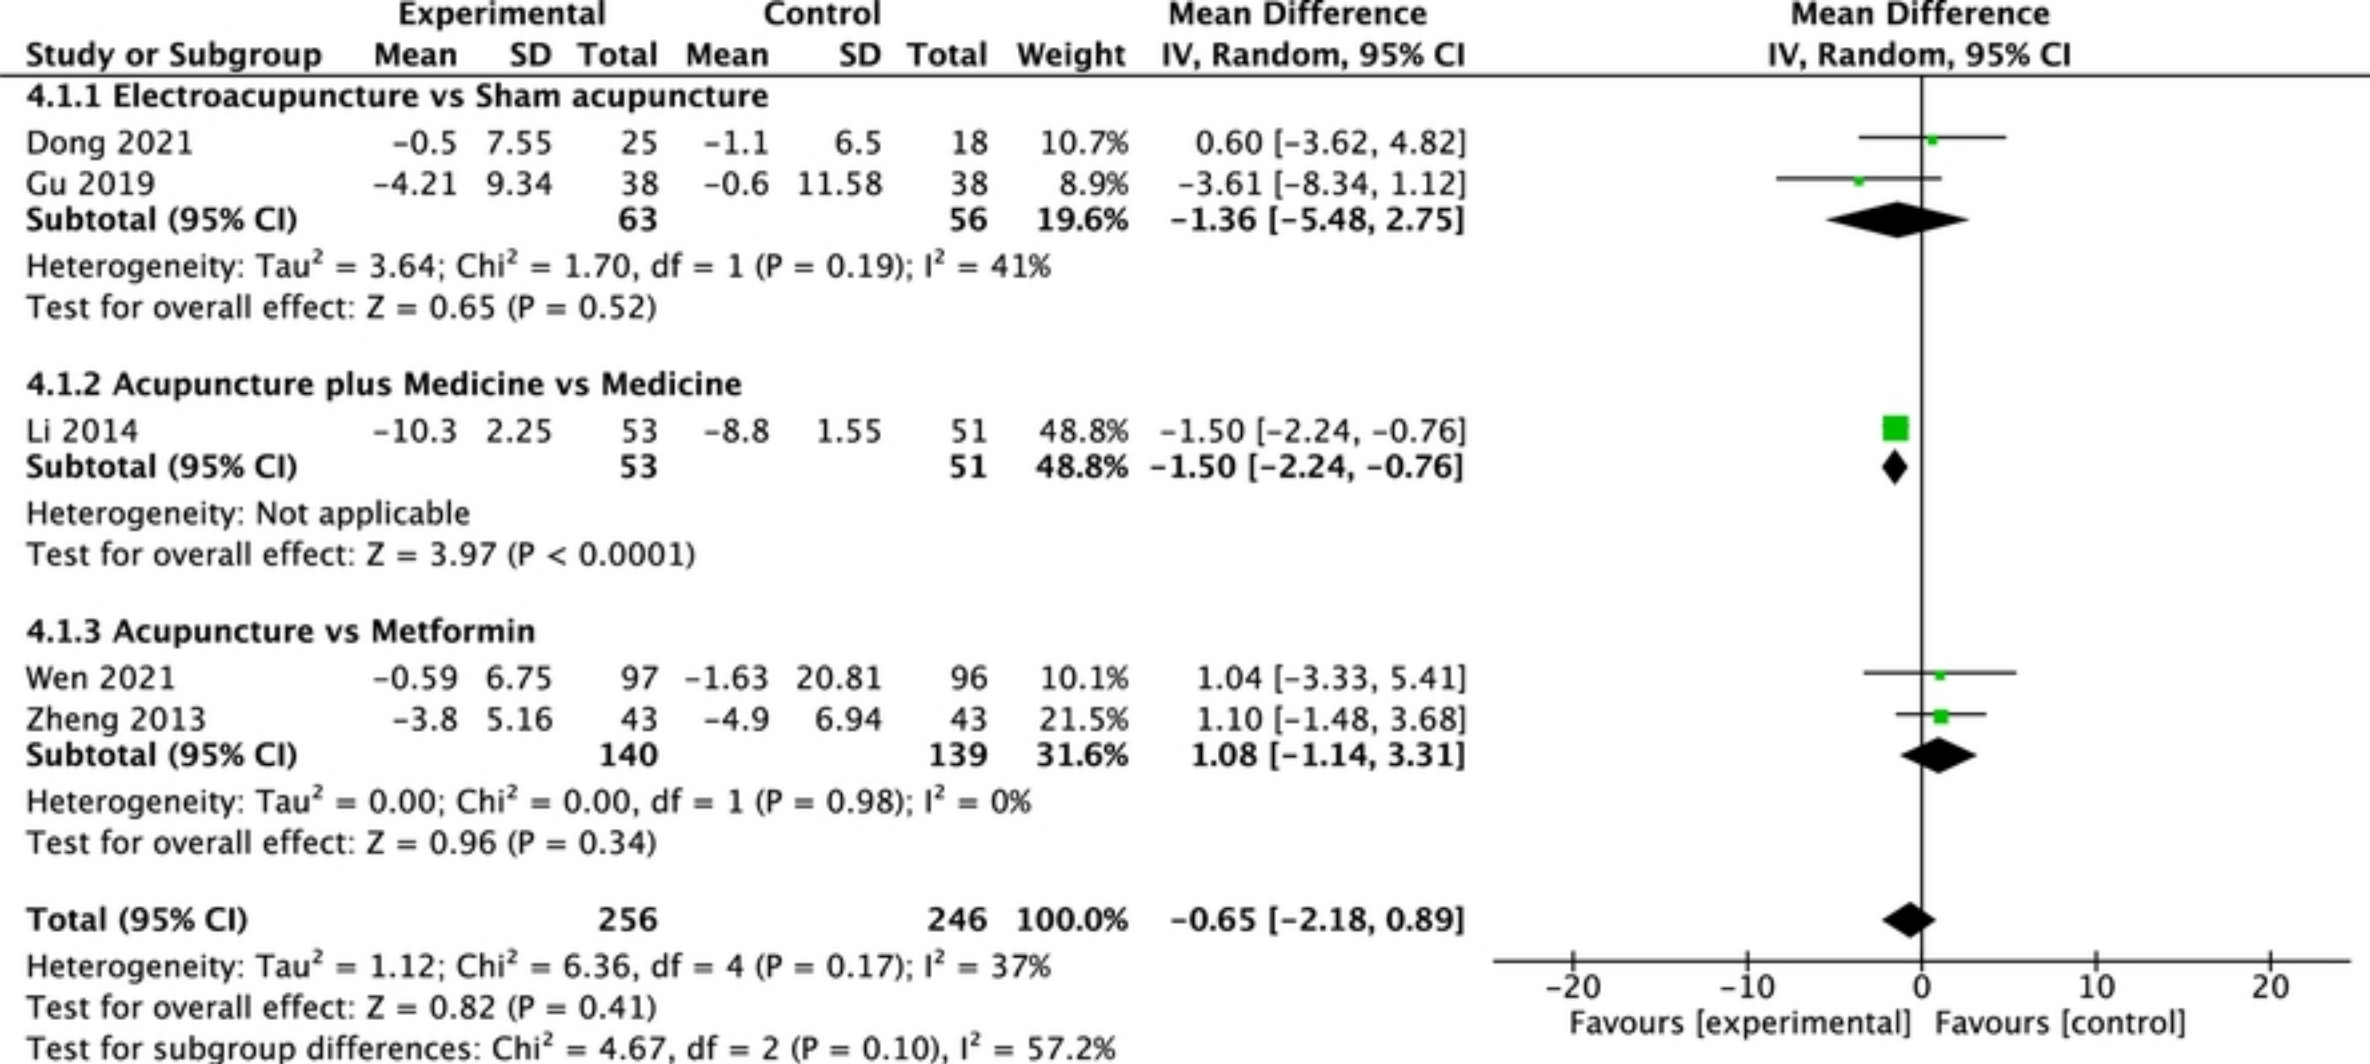

Fig7



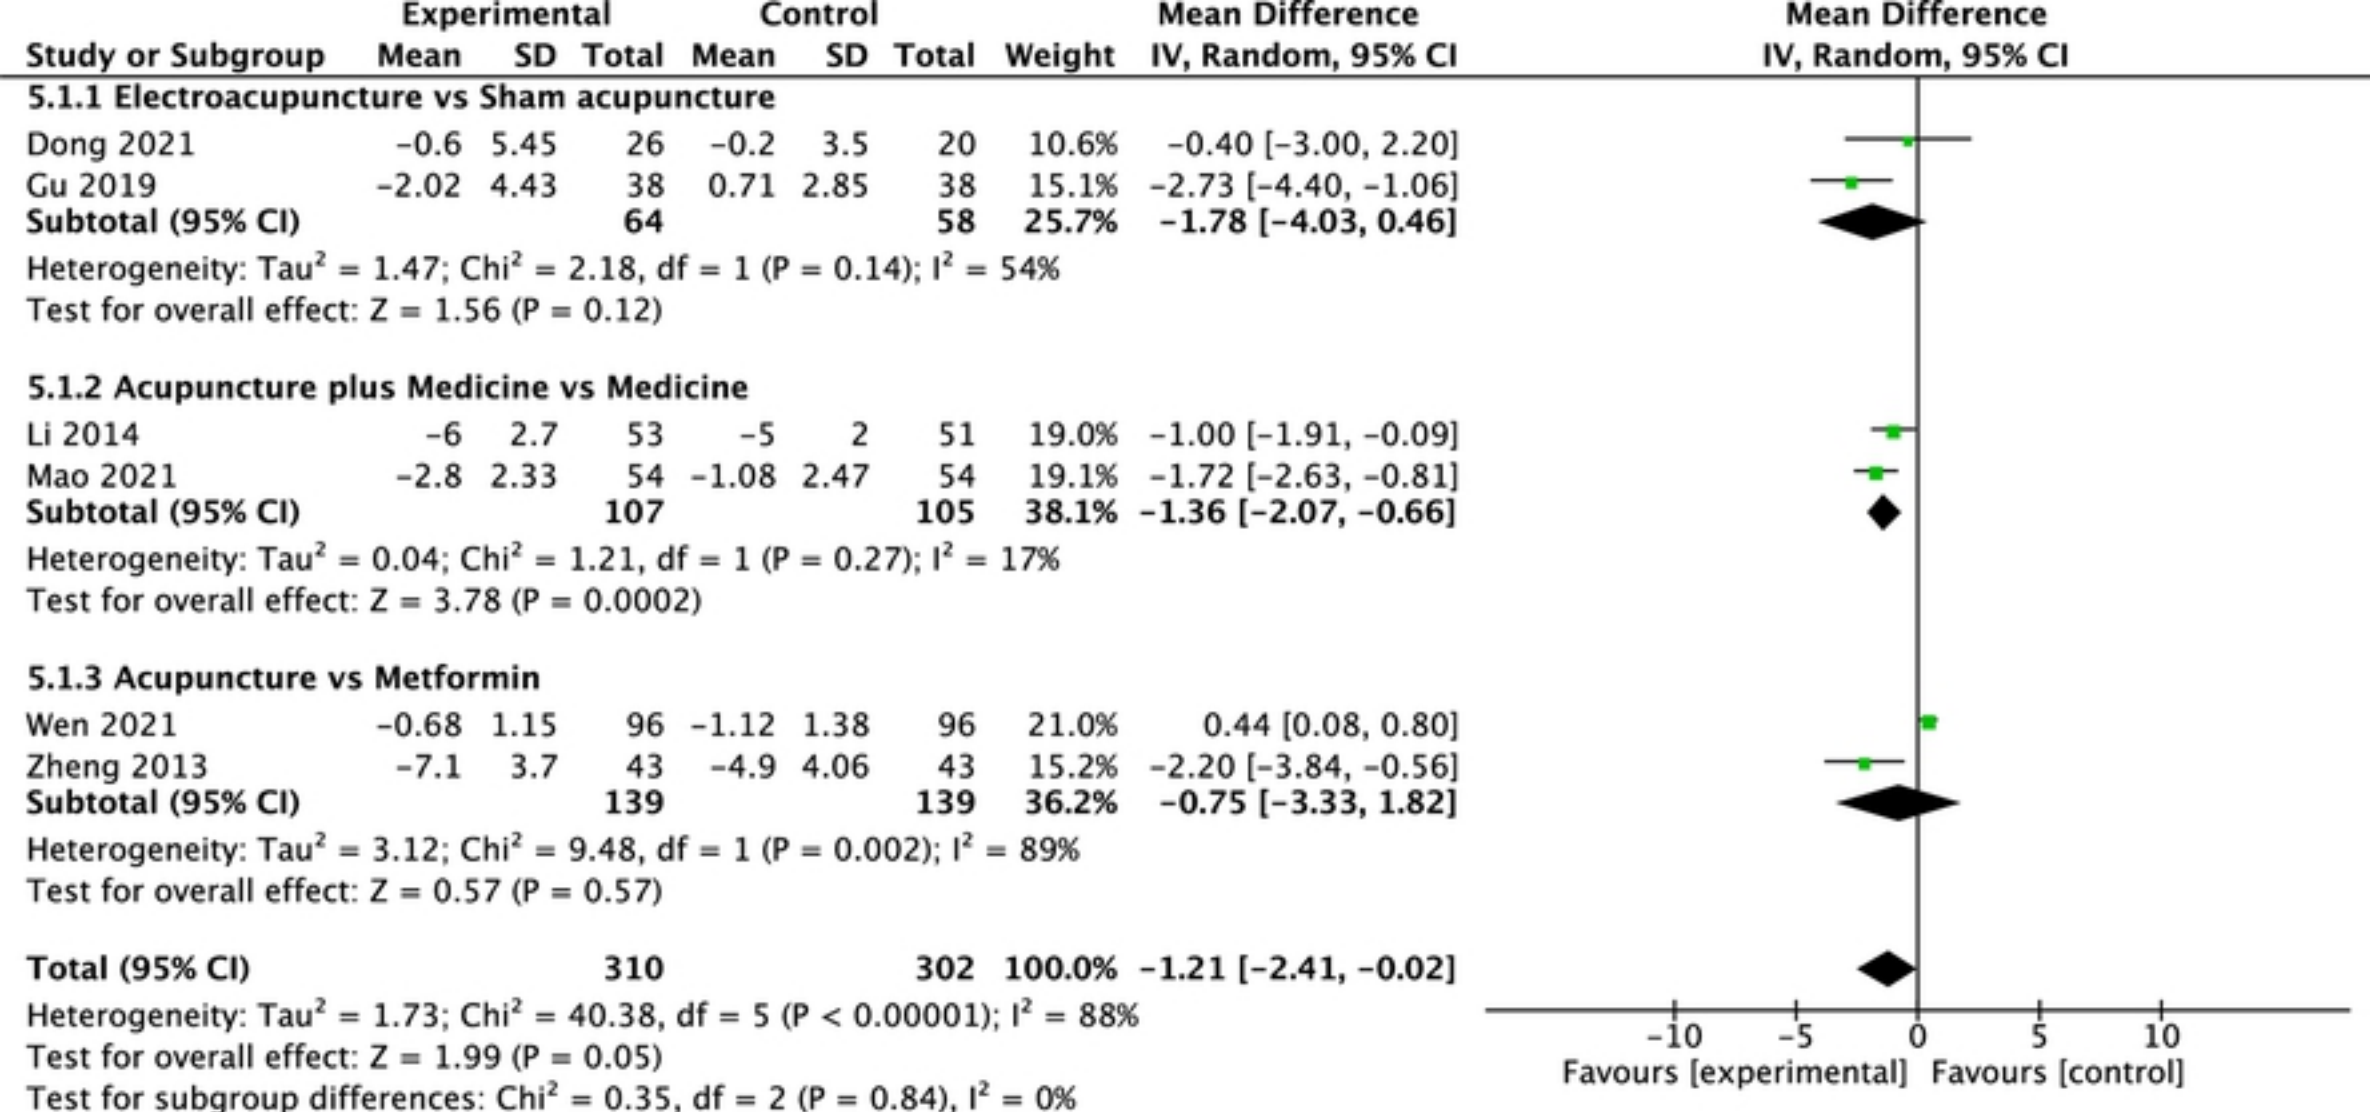

Fig8
